# Supplementary material for: Phylogenomics of the benzoxazinoid biosynthetic pathway of Poaceae: gene duplications and origin of the Bx cluster
Source: PubMed Central journal article supplement (PMC3449204; doi:10.1186/1471-2148-12-64), 2012-05-11
Supplement: 1471-2148-12-64-S2.pdf [file 1471-2148-12-64-S2.pdf]

## **Additional File 2**

**Figure S2. Maize BX2-BX5 alignment showing putative helices, P450 motifs, SRSs and sites under positive selection according to M8 results.** In blue are sites potentially under positive selection according to M8 results from codeml analyses. Putative helices are indicated in dotted boxes, SRSs are in orange boxes and the five P450 motifs are in purple.

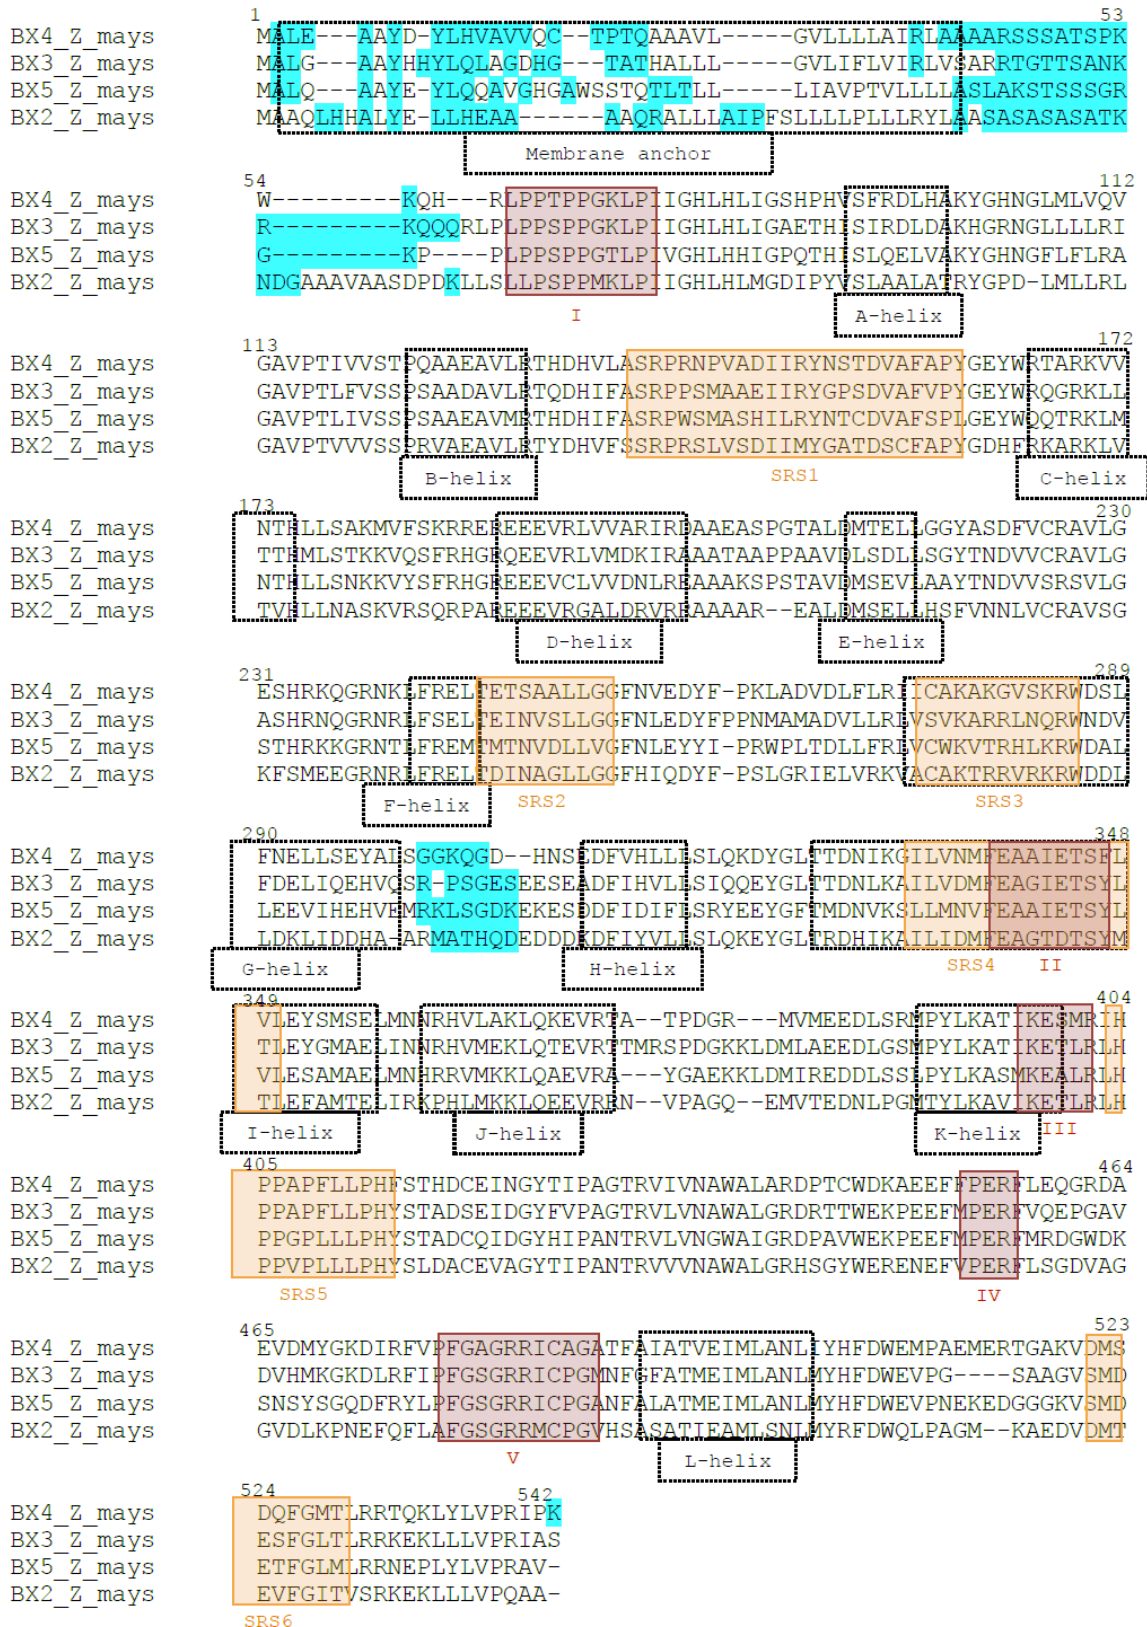

Figure S2
